# Supplementary material
Source: publisher site journal article supplement (https://www.spandidos-publications.com/7205/downloadSupplementary)
Supplement: Supplementary file 1 [file downloadSupplementary]

Table SI. Proteins differentially expressed after PLEKHA4 knockdown.

| Protein    | Description                                                                                      | Gene      | Expression |
|------------|--------------------------------------------------------------------------------------------------|-----------|------------|
| P21333     | Filamin-A                                                                                        | FLNA      | Down       |
| P49327     | Fatty acid synthase                                                                              | FASN      | Up         |
| P34931     | Heat shock 70 kDa protein 1-like                                                                 | HSPA1L    | Up         |
| Q32Q12     | Nucleoside diphosphate kinase                                                                    | NME1-NME2 | Up         |
| Q9UHN6     | Cell surface hyaluronidase                                                                       | CEMIP2    | Down       |
| P31946     | 14-3-3 protein $\beta/\alpha$                                                                    | YWHAB     | Up         |
| A8K6A6     | cDNA FLJ78619, highly similar to <i>Homo sapiens</i> melanoma cell adhesion molecule, mRNA       |           | Down       |
| Q562L9     | Actin-like protein (fragment)                                                                    | ACT       | Down       |
| P52895     | Aldo-keto reductase family 1 member C2                                                           | AKR1C2    | Up         |
| P04259     | Keratin, type II cytoskeletal 6B                                                                 | KRT6B     | Down       |
| A0A024R059 | Hydroxymethylglutaryl-CoA synthase                                                               | HMGCS1    | Up         |
| B4DKV4     | cDNA FLJ60647, highly similar to Keratin, type II cytoskeletal 6B                                |           | Down       |
| Q13740     | CD166 antigen                                                                                    | ALCAM     | Down       |
| D9YZV5     | Tropomyosin 1 ( $\alpha$ ) isoform 4                                                             | TPM1      | Down       |
| Q9NZ23     | Drug-sensitive protein 1                                                                         | YA61      | Down       |
| A0A024RBX6 | Pirin (Iron-binding nuclear protein), isoform CRA_a                                              | PIR       | Up         |
| P11233     | Ras-related protein Ral-A                                                                        | RALA      | Down       |
| B4DYC6     | cDNA FLJ60958, highly similar to <i>Homo sapiens</i> SGT1, suppressor of G2 allele of SKP1, mRNA |           | Up         |
| B2R4P9     | Histone H3                                                                                       | H3F3A     | Down       |
| Q8TE01     | DERP12 (dermal papilla derived protein 12)                                                       | derp12    | Down       |

|            |                                                                                           |                  |      |
|------------|-------------------------------------------------------------------------------------------|------------------|------|
| O15173     | Membrane-associated progesterone receptor component 2                                     | PGRMC2           | Down |
| Q5U0C3     | RAP1A, member of RAS oncogene family                                                      |                  | Down |
| P43007     | Neutral amino acid transporter A                                                          | SLC1A4           | Down |
| A6XND1     | Insulin-like growth factor-binding protein 3                                              |                  | Down |
| A0A4P2STI8 | MHC class I antigen                                                                       | HLA-B            | Down |
| A0A2I6J4D4 | MHC class I antigen                                                                       | HLA-A            | Down |
| P30405     | Peptidyl-prolyl cis-trans isomerase F, mitochondrial                                      | PPIF             | Down |
| A8K0D2     | cDNA FLJ77740, highly similar to <i>Homo sapiens</i> 7-dehydrocholesterol reductase, mRNA |                  | Up   |
| Q53XM7     | VAMP (vesicle-associated membrane protein)-associated protein B and C                     | VAPB             | Down |
| P05937     | Calbindin                                                                                 | CALB1            | Down |
| A0A087WWD4 | Neural cell adhesion molecule 1                                                           | NCAM1            | Down |
| Q8TED1     | Probable glutathione peroxidase 8                                                         | GPX8             | Down |
| P69905     | Hemoglobin subunit $\alpha$                                                               | HBA2             | Up   |
| M1VE83     | Tyrosine-protein kinase receptor                                                          | SDC4-ROS1_S4;R34 | Down |
| Q7Z2W9     | 39S ribosomal protein L21, mitochondrial                                                  | MRPL21           | Down |
| M0R1T5     | Charged multivesicular body protein 2a                                                    | CHMP2A           | Up   |
| A0A024R6A0 | Arginase                                                                                  | ARG2             | Down |
| Q16695     | Histone H3.1t                                                                             | H3-4             | Down |
| K4DIA7     | Tetraspanin (fragment)                                                                    | CD151            | Down |
| A0A896YBD6 | MHC class II antigen                                                                      | HLA-DQA1         | Down |
| Q14192     | Four and a half LIM domains protein 2                                                     | FHL2             | Down |
| P36639     | Oxidized purine nucleoside triphosphate hydrolase                                         | NUDT1            | Up   |

|        |                                                                                              |          |      |
|--------|----------------------------------------------------------------------------------------------|----------|------|
| O95470 | Sphingosine-1-phosphate lyase 1                                                              | SGPL1    | Down |
| O14933 | Ubiquitin/ISG15-conjugating enzyme E2 L6                                                     | UBE2L6   | Down |
| A6NMQ3 | $\alpha$ -endosulfine                                                                        | ENSA     | Up   |
| D3DR32 | M-phase phosphoprotein 1, isoform CRA_a                                                      | MPHOSPH1 | Down |
| Q71N00 | C75F                                                                                         |          | Down |
| Q92692 | Nectin-2                                                                                     | NECTIN2  | Down |
| B4DGI3 | TNF receptor-associated factor                                                               |          | Down |
| Q8IWR0 | Zinc finger CCCH domain-containing protein 7A                                                | ZC3H7A   | Down |
| Q96RD7 | Pannexin-1                                                                                   | PANX1    | Down |
| L0R6Q1 | SLC35A4 upstream open reading frame protein                                                  | SLC35A4  | Down |
| O60942 | mRNA-capping enzyme                                                                          | RNGTT    | Down |
| Q69EZ8 | Prothrombin (fragment)                                                                       |          | Down |
| B2R749 | cDNA, FLJ93285, highly similar to <i>Homo sapiens</i> cell division cycle associated 3, mRNA |          | Down |
| Q59H64 | Enhancer of zeste homolog 2 variant (fragment)                                               |          | Down |
| B4DMA8 | Kinesin-like protein                                                                         |          | Down |
| E9PE24 | Visinin-like protein 1 (fragment)                                                            | VSNL1    | Up   |
| B5MCR8 | Solute carrier family 30 (Zinc transporter), member 6, isoform CRA_b                         | SLC30A6  | Down |
| Q9BY76 | Angiopietin-related protein 4                                                                | ANGPTL4  | Down |
| P04271 | Protein S100-B                                                                               | S100B    | Up   |
| B3KPB8 | Receptor for retinol uptake STRA6                                                            |          | Up   |
| X5D8W0 | Cell adhesion molecule 1 isoform D (fragment)                                                | CADM1    | Down |
| Q8WXV6 | Plectin isoform 1a (fragment)                                                                | PLEC1    | Down |
| H3BP35 | Diphosphomevalonate decarboxylase (fragment)                                                 | MVD      | Up   |

|            |                                                                                               |          |      |
|------------|-----------------------------------------------------------------------------------------------|----------|------|
| H7BYY4     | Chromosome 10 open reading frame 89, isoform CRA_b                                            | PSTK     | Down |
| D9ZGG2     | Vitronectin                                                                                   | VTN      | Down |
| B2RBS8     | cDNA, FLJ95666, highly similar to <i>Homo sapiens</i> albumin, mRNA                           |          | Down |
| E9PGC8     | Microtubule-associated protein 1A                                                             | MAP1A    | Down |
| P42574     | Caspase-3                                                                                     | CASP3    | Down |
| A0A7R8C2E8 | MHC class I antigen                                                                           | HLA-C    | Down |
| Q9C002     | Normal mucosa of esophagus-specific gene 1 protein                                            | NMES1    | Down |
| Q99685     | Monoglyceride lipase                                                                          | MGLL     | Down |
| A8K2X6     | cDNA FLJ77840, highly similar to <i>Homo sapiens</i> solute carrier family 43, member 3, mRNA |          | Down |
| B7Z507     | Matrix metalloproteinase-9                                                                    |          | Down |
| A0A8V8TMY5 | E3 ubiquitin-protein ligase Hakai                                                             | CBLL1    | Down |
| B4DGP7     | Nucleolar protein 12                                                                          |          | Down |
| J3QLM1     | StAR-related lipid transfer protein 3                                                         | STARD3   | Down |
| H7C417     | Mitochondrial fission process protein 1 (fragment)                                            |          | Down |
| A0A024R5L4 | Transmembrane protein 126B, isoform CRA_c                                                     | TMEM126B | Down |
| B3KNQ9     | cDNA FLJ30200 fis, clone BRACE2001455, highly similar to heat shock factor protein 1          |          | Down |
| A0A087WU07 | MICOS complex subunit MIC10                                                                   | MICOS10  | Down |
| Q9GZP4     | PITH domain-containing protein 1                                                              | PITHD1   | Down |
| Q9Y6N1     | Cytochrome <i>c</i> oxidase assembly protein COX11, mitochondrial                             | COX11    | Down |

|            |                                                                  |           |      |
|------------|------------------------------------------------------------------|-----------|------|
| Q96CS2     | HAUS augmin-like complex subunit 1                               | HAUS1     | Down |
| Q2L6J2     | DNA-directed RNA polymerase subunit                              | ZNRD1     | Down |
| B4DVV7     | Methionine--tRNA ligase, mitochondrial                           |           | Down |
| A0A1U9X8R9 | RING-type E3 ubiquitin transferase                               |           | Down |
| B4DPS7     | Hermansky-Pudlak syndrome 3 protein homolog                      |           | Down |
| M0QYM3     | Protein lin-37 homolog                                           | LIN37     | Down |
| O00124     | UBX domain-containing protein 8                                  | UBXN8     | Down |
| Q2KHR3     | Glutamine and serine-rich protein 1                              | QSER1     | Down |
| Q8TBR7     | TLC domain-containing protein 3A                                 | TLCD3A    | Down |
| A0A804HJB3 | mRNA export factor GLE1                                          | GLE1      | Down |
| H0YH70     | Multiple PDZ domain protein (fragment)                           | MPDZ      | Down |
| Q8WXE9     | Stonin-2                                                         | STON2     | Down |
| P0C221     | Coiled-coil domain-containing protein 175                        | CCDC175   | Down |
| B4DQD8     | ADP-ribosylation factor-like protein 2-binding protein           |           | Up   |
| B4DIA8     | Battenin                                                         |           | Up   |
| A0PJH0     | GPR110 protein (fragment)                                        | GPR110    | Down |
| A0A059QFD5 | Cytochrome <i>c</i> oxidase subunit 2                            | COX2      | Down |
| A0A8V8TM60 | Single-pass membrane and coiled-coil domain-containing protein 2 | SMCO2     | Down |
| Q9NP84     | Tumor necrosis factor receptor superfamily member 12A            | TNFRSF12A | Down |
| Q9H2X9     | Solute carrier family 12 member 5                                | SLC12A5   | Down |
| A0A126GW78 | Olfactory receptor                                               | OR5AC2    | Down |
| E7EM50     | GPI ethanolamine phosphate transferase 2                         | PIGG      | Down |
| A0A1W2PPI5 | DEAD/H (Asp-Glu-Ala-Asp/His) box                                 | INTS6L    | Down |

|            |                                                                  |           |      |
|------------|------------------------------------------------------------------|-----------|------|
|            | polypeptide 26B, isoform CRA_b                                   |           |      |
| A0A0A0MQV6 | Fibroblast growth factor                                         | FGF2      | Down |
| B4DZC6     | cDNA FLJ60989, highly similar to Bardet-Biedl syndrome 5 protein |           | Down |
| Q96G28     | Cilia- and flagella-associated protein 36                        | CFAP36    | Up   |
| A0A6Q8PGB1 | Centrosomal protein of 290 kDa                                   | CEP290    | Down |
| Q86WW8     | Cytochrome <i>c</i> oxidase assembly factor 5                    | COA5      | Down |
| L0R6G9     | Alternative protein                                              | FUNDC2    | Down |
| F8U8C0     | Tumor necrosis factor receptor superfamily member 10A            | TNFRSF10A | Down |
| A0A024R035 | Complement component C9                                          | C9        | Down |
| P48775     | Tryptophan 2,3-dioxygenase                                       | TDO2      | Down |
| Q9H981     | Actin-related protein 8                                          | ACTR8     | Down |
| C9J5X1     | Tyrosine-protein kinase receptor                                 | IGF1R     | Down |
| Q13432     | Protein unc-119 homolog A                                        | UNC119    | Down |
| A0A087WVI3 | Deuterosome assembly protein 1                                   | DEUP1     | Down |
| P05120     | Plasminogen activator inhibitor 2                                | SERPINB2  | Down |
| A4PB31     | Ovule protein                                                    |           | Down |
| F6RJM5     | non-specific serine/threonine kinase                             | RPS6KC1   | Down |
| A0A0A0MT16 | ATP-binding cassette sub-family A member 13                      | ABCA13    | Down |
| K7EKM5     | Triggering receptor expressed on myeloid cells 1                 | TREM1     | Down |
| O60637     | Tetraspanin-3                                                    | TSPAN3    | Up   |
| P35499     | Sodium channel protein type 4 subunit $\alpha$                   | SCN4A     | Down |
| Q8IYB1     | Nucleotidyltransferase                                           | MB21D2    | Down |

|            |                                                                                    |          |      |
|------------|------------------------------------------------------------------------------------|----------|------|
| X6RHX1     | Protein-associating with the carboxyl-terminal domain of ezrin (Fragment)          | SCYL3    | Up   |
| B2R6W1     | cDNA, FLJ93143, highly similar to <i>Homo sapiens</i> complement component 7, mRNA |          | Down |
| A0A0C4DGG5 | Rho GTPase-activating protein 20                                                   | ARHGAP20 | Down |

---
